# Supplementary material
Source: PubMed Central journal article supplement (PMC3650137)
Supplement: NIHMS231949-supplement-1_si_001.pdf [file NIHMS231949-supplement-1_si_001.pdf]

[Supporting Information (SI) to accompany a manuscript submitted to ACS Nano]

### Biological Evaluation of pH-Responsive Polymer-Caged Nanobins for Breast Cancer Therapy

Sang-Min Lee,<sup>† 1,3,6</sup> Richard W. Ahn,<sup>† 1,3,6</sup> Feng Chen,<sup>3,4,6</sup> Angela J. Fought,<sup>5,6</sup> Thomas V. O'Halloran,<sup>\*1,2,3,6</sup>  
Vincent L. Cryns,<sup>\*3,4,6</sup> and SonBinh T. Nguyen<sup>\*1,3,6</sup>

<sup>1</sup>Department of Chemistry, <sup>2</sup>Department of Biochemistry, Molecular Biology, and Cell Biology, <sup>3</sup>Center of Cancer Nanotechnology Excellence, Northwestern University, 2145 Sheridan Road, Evanston, Illinois 60208; <sup>4</sup>Cell Death Regulation Laboratory, Departments of Medicine and Cell and Molecular Biology, <sup>5</sup>Department of Preventive Medicine, Feinberg School of Medicine, <sup>6</sup>Robert H. Lurie Comprehensive Cancer Center, Northwestern University, 303 East Chicago Avenue, Chicago, Illinois 60611

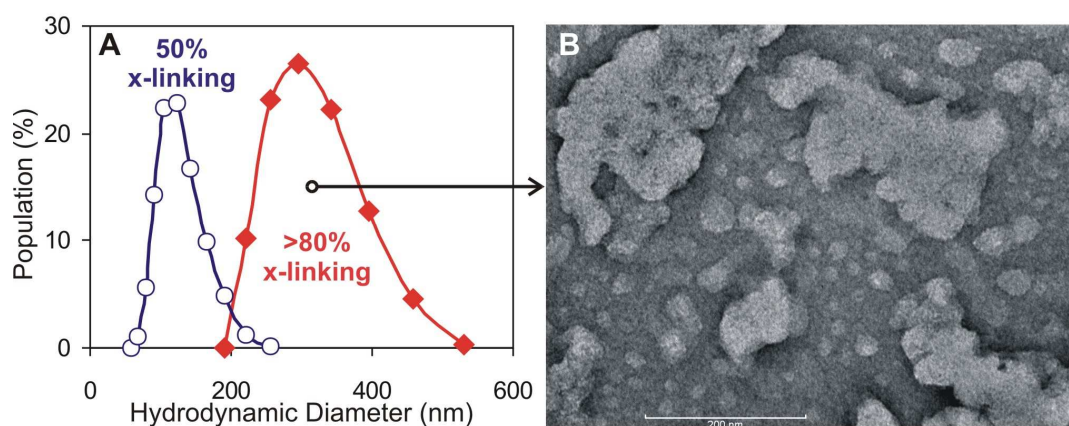

**Figure S1.** (A) The DLS-measured particle size distribution of PCNs with 50% and >80% cross-links. (B) The transmission electron micrograph of PCN with >80% cross-links, stained with aqueous uranyl acetate (4 wt%).

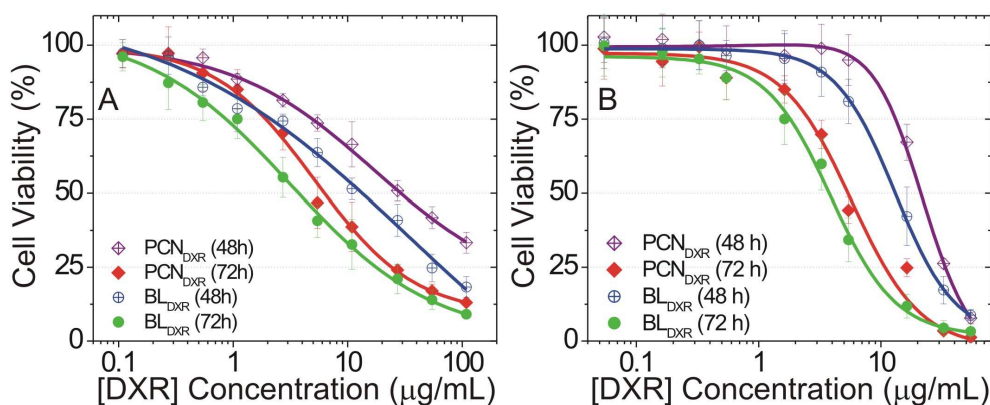

**Figure S2.** *In vitro* cytotoxicity of DXR-encapsulated polymer-caged nanobins (PCN<sub>DXR</sub>) and bare liposomes (BL<sub>DXR</sub>) against (A) MDA-MB-231 and (B) HeLa cells during 48-h (open symbols) and 72-h (closed symbols) incubations.

**Table S1.** Bonferroni-adjusted p-values of efficacy study 1.

| Comparison                       | Weeks |     |     |      |      |      |      |      |      |      |      |      |
|----------------------------------|-------|-----|-----|------|------|------|------|------|------|------|------|------|
|                                  | 0     | 0.5 | 1.0 | 1.5  | 2.0  | 2.5  | 3    | 3.5  | 4    | 4.5  | 5    | 5.5  |
| PCN <sub>DXR</sub> vs free DXR   | NS    | NS  | NS  | 0.02 | NS   | 0.04 | NS   | NS   | NS   | NS   | NS   | NS   |
| Free DXR vs empty PCNs           | NS    | NS  | NS  | NS   | NS   | NS   | NS   | NS   | NS   | NS   | NS   | NS   |
| PCN <sub>DXR</sub> vs empty PCNs | NS    | NS  | NS  | NS   | 0.03 | NS   | 0.01 | 0.03 | 0.02 | 0.02 | 0.01 | 0.01 |

NS: Not significant.

**Table S2.** Bonferroni-adjusted p-values of efficacy study 2.

| Comparison                                                       | Days |    |    |      |      |      |
|------------------------------------------------------------------|------|----|----|------|------|------|
|                                                                  | 1    | 4  | 8  | 12   | 15   | 20   |
| PCN <sub>DXR</sub> (2.0 mg/kg) vs PBS                            | NS   | NS | NS | 0.03 | 0.01 | NS   |
| PCN <sub>DXR</sub> (5.0 mg/kg) vs PBS                            | NS   | NS | NS | 0.04 | 0.03 | 0.02 |
| PCN <sub>DXR</sub> (7.5 mg/kg) vs PBS                            | NS   | NS | NS | 0.01 | 0.01 | 0.02 |
| PCN <sub>DXR</sub> (2.0 mg/kg) vs PCN <sub>DXR</sub> (5.0 mg/kg) | NS   | NS | NS | NS   | NS   | NS   |
| PCN <sub>DXR</sub> (2.0 mg/kg) vs PCN <sub>DXR</sub> (7.5 mg/kg) | NS   | NS | NS | NS   | NS   | NS   |
| PCN <sub>DXR</sub> (5.0 mg/kg) vs PCN <sub>DXR</sub> (7.5 mg/kg) | NS   | NS | NS | NS   | NS   | NS   |

NS: Not significant.
